# Supplementary material for: Economic Burden of Informal Caregiving Associated With History of Stroke and Falls Among Older Adults in the U.S
Source: PubMed Central journal article supplement — Am J Prev Med. Author manuscript; Available in PMC 2018 Feb 20. (PMC5819006; doi:10.1016/j.amepre.2017.07.020), 2017-12
Supplement: NIHMS939653-supplement-1.pdf [file NIHMS939653-supplement-1.pdf]

**Appendix**  
**Economic Burden of Informal Caregiving Associated With History of Stroke**  
**and Falls Among Older Adults in the U.S.**  
Joo et al.

**Appendix Figure 1.** Conceptual model of informal caregiving for stroke and falls.

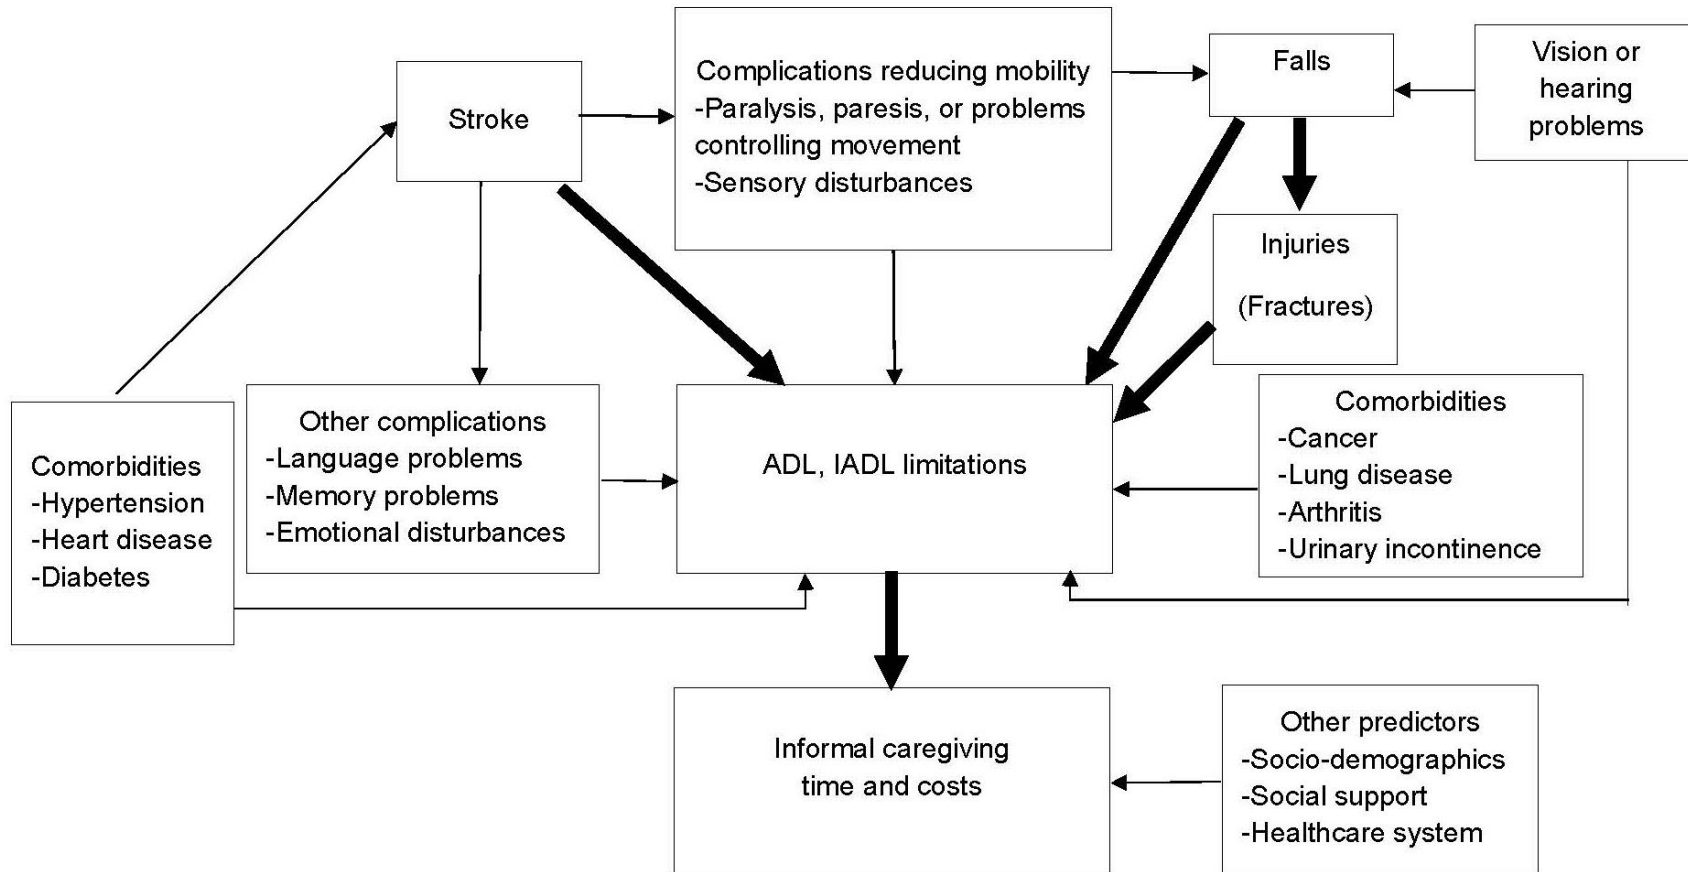

ADL, Activities of Daily Life, IADL, Instrumental Activities of Daily Life

**Appendix**  
**Economic Burden of Informal Caregiving Associated With History of Stroke**  
**and Falls Among Older Adults in the U.S.**  
**Joo et al.**

**Appendix Figure 2.** Weekly hours of informal caregiving in stroke versus non-stroke group for those with no falls and those with falls, by injury status.

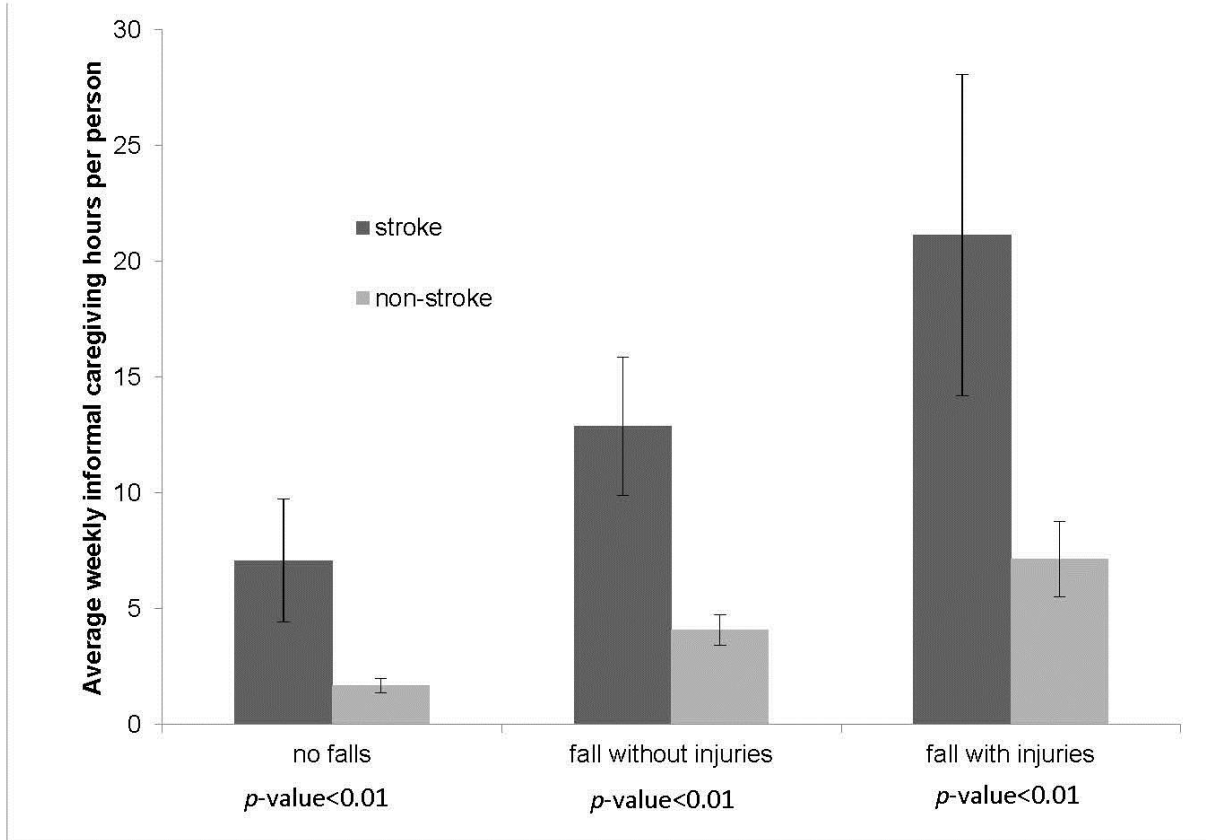

Notes: Error bars show 95% CIs.

**Appendix**  
**Economic Burden of Informal Caregiving Associated With History of Stroke**  
**and Falls Among Older Adults in the U.S.**  
**Joo et al.**

**Appendix Table 1.** Estimates From Two-part Models

| Independent variables                               | Stroke (N=970) |                 | Non-stroke (N=9,159) |                 | Total (N=10,129) |                 |
|-----------------------------------------------------|----------------|-----------------|----------------------|-----------------|------------------|-----------------|
|                                                     | Coef.          | <i>p</i> -value | Coef.                | <i>p</i> -value | Coef.            | <i>p</i> -value |
| The first part (logit regression)                   |                |                 |                      |                 |                  |                 |
| Fall without injury                                 | 0.724          | <0.001          | 0.697                | <0.001          | 0.725            | <0.001          |
| Fall with injury                                    | 1.443          | <0.001          | 0.941                | <0.001          | 1.049            | <0.001          |
| Race/Ethnicity                                      |                |                 |                      |                 |                  |                 |
| Non-Hispanic black                                  | 1.045          | 0.003           | 0.256                | 0.070           | 0.396            | 0.003           |
| Hispanic                                            | 0.935          | 0.002           | 0.362                | 0.009           | 0.408            | 0.001           |
| Other races                                         | -0.927         | 0.107           | 0.250                | 0.401           | 0.116            | 0.685           |
| Female                                              | 0.150          | 0.466           | 0.116                | 0.169           | 0.094            | 0.244           |
| Age, years                                          |                |                 |                      |                 |                  |                 |
| 75–84                                               | 0.675          | 0.001           | 0.566                | <0.001          | 0.594            | <0.001          |
| ≥85                                                 | 1.082          | <0.001          | 1.482                | <0.001          | 1.418            | <0.001          |
| Education                                           |                |                 |                      |                 |                  |                 |
| High school                                         | -0.142         | 0.477           | -0.431               | <0.001          | -0.383           | <0.001          |
| Some college                                        | -0.272         | 0.288           | -0.606               | <0.001          | -0.546           | <0.001          |
| College and more                                    | -0.156         | 0.518           | -0.800               | <0.001          | -0.677           | <0.001          |
| Currently married                                   | 0.688          | 0.003           | 0.473                | <0.001          | 0.511            | <0.001          |
| # of chronic conditions                             |                |                 |                      |                 |                  |                 |
| 2–3                                                 | 0.492          | 0.257           | 0.831                | <0.001          | 0.877            | <0.001          |
| ≥4                                                  | 1.265          | 0.003           | 1.695                | <0.001          | 1.789            | <0.001          |
| Total non-housing wealth (U.S. \$)                  |                |                 |                      |                 |                  |                 |
| ≤6,000                                              | 0.097          | 0.661           | 0.281                | 0.004           | 0.250            | 0.003           |
| 66,001–306,000                                      | -0.349         | 0.144           | -0.350               | 0.002           | -0.362           | <0.001          |
| >306,000                                            | -0.192         | 0.467           | -0.183               | 0.116           | -0.222           | 0.048           |
| Formal caregiving utilization                       | 1.466          | <0.001          | 1.922                | <0.001          | 1.851            | <0.001          |
| Constant                                            | -3.248         | <0.001          | -3.918               | <0.001          | -3.982           | <0.001          |
| The second part (ordinary least squares regression) |                |                 |                      |                 |                  |                 |
| Fall without injury                                 | 0.059          | 0.802           | 0.043                | 0.666           | 0.055            | 0.531           |
| Fall with injury                                    | 0.122          | 0.597           | 0.353                | 0.010           | 0.317            | 0.006           |
| Race/Ethnicity                                      |                |                 |                      |                 |                  |                 |
| Non-Hispanic black                                  | 0.493          | 0.046           | 0.414                | <0.001          | 0.472            | <0.001          |
| Hispanic                                            | 0.623          | 0.004           | 0.289                | 0.109           | 0.353            | 0.032           |
| Other races                                         | 0.383          | 0.369           | 1.085                | <0.001          | 1.032            | <0.001          |
| Female                                              | 0.092          | 0.515           | 0.150                | 0.140           | 0.118            | 0.155           |
| Age, years                                          |                |                 |                      |                 |                  |                 |
| 75–84                                               | -0.048         | 0.838           | 0.047                | 0.647           | 0.049            | 0.616           |

**Appendix**  
**Economic Burden of Informal Caregiving Associated With History of Stroke**  
**and Falls Among Older Adults in the U.S.**  
**Joo et al.**

|                                           |        |       |        |        |        |        |
|-------------------------------------------|--------|-------|--------|--------|--------|--------|
| ≥85                                       | 0.300  | 0.150 | 0.202  | 0.069  | 0.222  | 0.018  |
| <b>Education</b>                          |        |       |        |        |        |        |
| High school                               | 0.039  | 0.835 | -0.227 | 0.052  | -0.151 | 0.152  |
| Some college                              | -0.060 | 0.824 | -0.208 | 0.112  | -0.167 | 0.143  |
| College and more                          | -0.048 | 0.857 | -0.072 | 0.633  | -0.026 | 0.820  |
| Currently married                         | 0.673  | 0.007 | 0.417  | <0.001 | 0.463  | <0.001 |
| <b># of chronic conditions</b>            |        |       |        |        |        |        |
| 2-3                                       | 0.377  | 0.440 | 0.012  | 0.945  | 0.050  | 0.767  |
| ≥4                                        | 0.196  | 0.662 | 0.180  | 0.292  | 0.258  | 0.111  |
| <b>Total non-housing wealth (U.S. \$)</b> |        |       |        |        |        |        |
| ≤6,000                                    | 0.062  | 0.824 | 0.179  | 0.075  | 0.156  | 0.123  |
| 66,001-306,000                            | -0.056 | 0.844 | -0.147 | 0.361  | -0.139 | 0.321  |
| >306,000                                  | -0.146 | 0.650 | -0.217 | 0.160  | -0.211 | 0.117  |
| Formal caregiving                         | 0.269  | 0.229 | 0.312  | 0.020  | 0.329  | 0.003  |
| Constant                                  | 1.848  | 0.001 | 1.835  | <0.001 | 1.773  | <0.001 |

Coef., coefficient

**Appendix**  
**Economic Burden of Informal Caregiving Associated With History of Stroke**  
**and Falls Among Older Adults in the U.S.**  
**Joo et al.**

**Appendix Table 2.** Marginal Effects (ME) From Two-part Models

| Independent variables                     | Stroke (N=970) |                 | Non-stroke (N=9,159) |                 | Total (N=10,129) |                 |
|-------------------------------------------|----------------|-----------------|----------------------|-----------------|------------------|-----------------|
|                                           | ME             | <i>p</i> -value | ME                   | <i>p</i> -value | ME               | <i>p</i> -value |
| Fall without injury                       | 5.26           | 0.096           | 1.70                 | <0.001          | 2.12             | <0.001          |
| Fall with injury                          | 10.54          | 0.001           | 3.28                 | <0.001          | 4.06             | <0.001          |
| <b>Race/ethnicity</b>                     |                |                 |                      |                 |                  |                 |
| Non-Hispanic black                        | 12.77          | <0.001          | 1.96                 | <0.001          | 3.00             | <0.001          |
| Hispanic                                  | 13.74          | <0.001          | 1.78                 | 0.025           | 2.54             | 0.004           |
| Other races                               | -0.90          | 0.889           | 4.21                 | <0.001          | 4.60             | 0.001           |
| Female                                    | 2.10           | 0.298           | 0.76                 | 0.026           | 0.74             | 0.038           |
| <b>Age, years</b>                         |                |                 |                      |                 |                  |                 |
| 75–84                                     | 3.60           | 0.194           | 1.42                 | 0.001           | 1.76             | <0.001          |
| ≥85                                       | 10.56          | 0.002           | 3.98                 | <0.001          | 4.63             | <0.001          |
| <b>Education</b>                          |                |                 |                      |                 |                  |                 |
| High school                               | -0.49          | 0.870           | -1.72                | <0.001          | -1.63            | 0.001           |
| Some college                              | -2.45          | 0.460           | -2.05                | 0.001           | -2.12            | 0.001           |
| College and more                          | -1.58          | 0.645           | -2.02                | 0.002           | -1.88            | 0.001           |
| Currently married                         | 12.84          | <0.001          | 2.46                 | <0.001          | 3.27             | <0.001          |
| <b>Number of chronic conditions</b>       |                |                 |                      |                 |                  |                 |
| 2–3                                       | 7.85           | 0.246           | 1.89                 | 0.008           | 2.50             | 0.003           |
| ≥4                                        | 10.37          | 0.108           | 4.38                 | <0.001          | 5.75             | <0.001          |
| <b>Total non-housing wealth (U.S. \$)</b> |                |                 |                      |                 |                  |                 |
| ≤6,000                                    | 1.39           | 0.707           | 1.23                 | <0.001          | 1.30             | 0.003           |
| 66,001–306,000                            | -2.90          | 0.476           | -1.27                | 0.025           | -1.52            | 0.014           |
| >306,000                                  | -3.05          | 0.500           | -1.14                | 0.045           | -1.46            | 0.022           |
| Formal caregiving utilization             | 12.56          | <0.001          | 5.33                 | <0.001          | 6.21             | <0.001          |

**Appendix**  
**Economic Burden of Informal Caregiving Associated With History of Stroke**  
**and Falls Among Older Adults in the U.S.**  
**Joo et al.**

**Appendix Table 3.** Lower-bound Estimates of Incremental Hours and Economic Burden of Informal Caregiving Associated With Falls With and Without Injuries, per Person

| Model <sup>a</sup> /Fall status <sup>b</sup> | Weekly hours <sup>c,d</sup>   | Annual economic burden          |                                                |
|----------------------------------------------|-------------------------------|---------------------------------|------------------------------------------------|
|                                              |                               | Per patient (\$) <sup>d,e</sup> | National estimates (\$ billion) <sup>d,f</sup> |
| <b>Stroke</b>                                |                               |                                 |                                                |
| Falls without injuries                       | 5.26<br>(-0.94, 11.46)        | 1,983<br>(-354, 4,320)          | 2.18<br>(-0.39, 4.75)                          |
| Fall with injuries                           | <b>10.54</b><br>(4.10, 16.98) | <b>3,974</b><br>(1,546, 6,401)  | <b>1.99</b><br>(0.77, 3.20)                    |
| <b>Non-stroke</b>                            |                               |                                 |                                                |
| Falls without injuries                       | <b>1.70</b><br>(0.97, 2.42)   | <b>641</b><br>(366, 912)        | <b>5.58</b><br>(3.18, 7.94)                    |
| Fall with injuries                           | <b>3.28</b><br>(2.17, 4.39)   | <b>1,237</b><br>(818, 1,655)    | <b>4.45</b><br>(2.95, 5.96)                    |
| <b>Total</b>                                 |                               |                                 |                                                |
| Falls without injuries                       | <b>2.12</b><br>(1.34, 2.90)   | <b>799</b><br>(505, 1,093)      | <b>7.91</b><br>(5.00, 10.82)                   |
| Fall with injuries                           | <b>4.06</b><br>(3.02, 5.11)   | <b>1,531</b><br>(1,139, 1,926)  | <b>6.43</b><br>(4.78, 8.09)                    |

Notes: Boldface indicates statistical significance ( $p < 0.05$ ).

<sup>a</sup> Authors conducted three two-part models separately, using different samples. The first model used stroke survivors only, the second used those who never had a stroke only, and the last model used all samples.

<sup>b</sup> Fall status is the main independent variable. Other independent variables used in the model is shown in footnote C.

<sup>c</sup> Estimated results are from two-part models with adjustment for race, gender, age, marital status, education, number of chronic diseases (0–1, 2–3, and  $\geq 4$ ), net total non-housing wealth, and usage of formal caregiving.

<sup>d</sup> Numbers in brackets are the 95% CIs.

<sup>e</sup> Per-patient lower-bound annual economic burden of informal caregiving associated with falls with and without injuries were estimated by multiplying total weekly hours by 52 weeks and then multiplying the product by the federal minimum wage (\$7.25/hour) supplied by Wage and Hour Division in the U.S. Department of Labor.

<sup>f</sup> National estimates were derived by multiplying the per capita annual economic burden of informal caregiving times the national estimate of people with stroke and without stroke aged  $\geq 65$  years from 2010 HRS by their experience with falling.
